# Supplementary material
Source: Springer Nature journal article supplement (https://www.springermedizin.de/resource/supplementary/12890_2011_335_MOESM4_ESM.pdf/9505038)

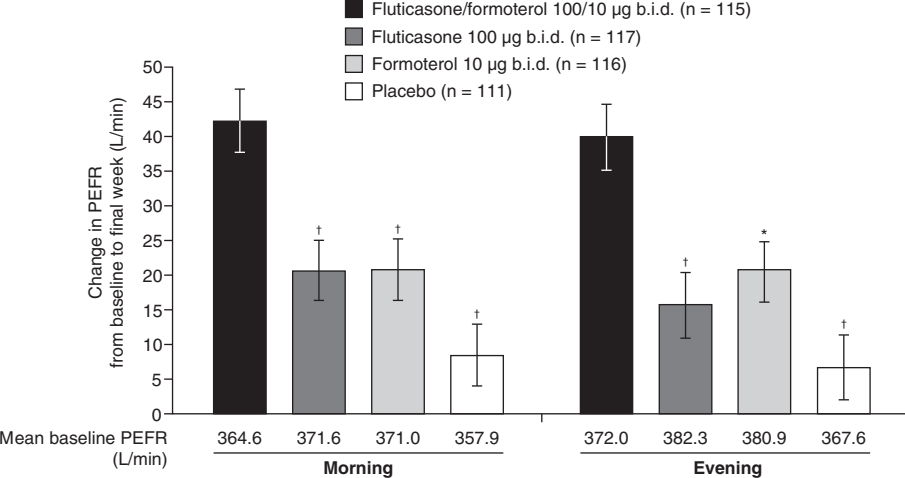

Supplement: MOESM4 [file 9505038]
